# Supplementary material for: Confinement primes cells for faster migration by polarizing active mitochondria
Source: Royal Society of Chemistry journal article supplement (doi:10.1039/d3na00478c), 2023-11-22
Supplement: d3na00478c1.pdf [file d3na00478c1.pdf]

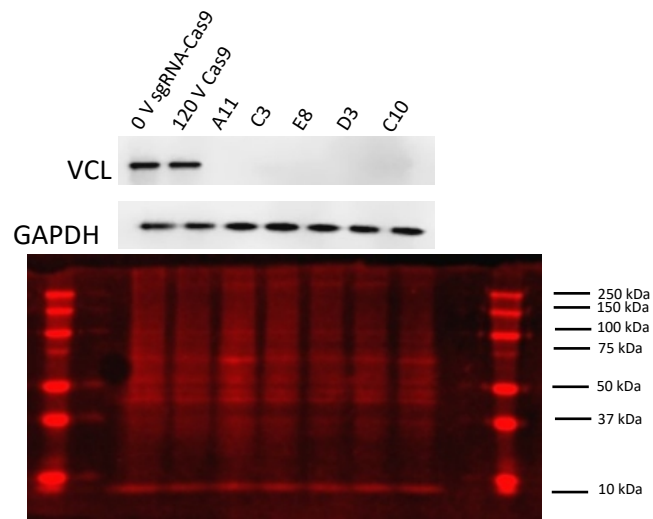

Total protein stain to show loading and ladder.

### Uncropped Blots

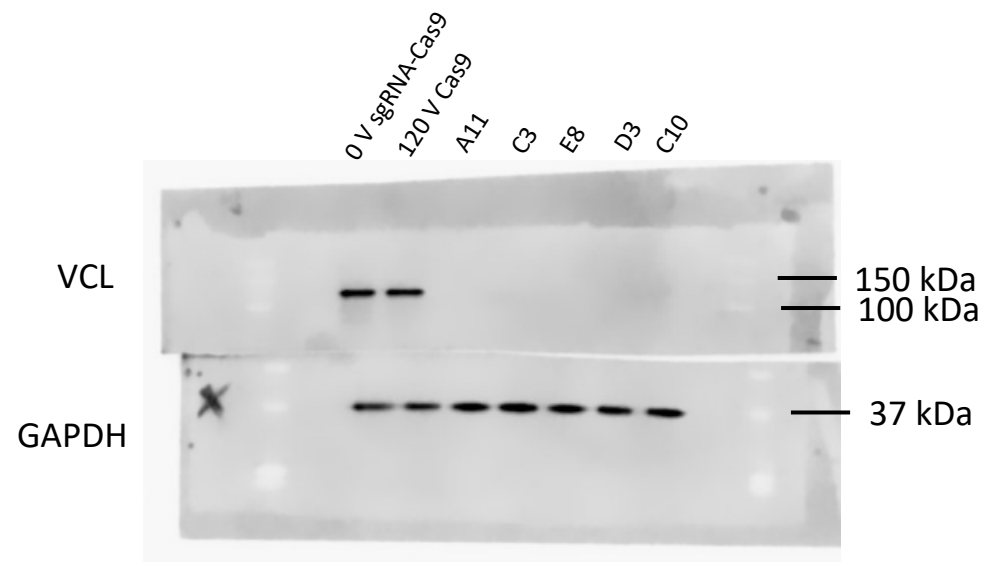

- After transferring protein from gel to PVDF membrane, performed total protein stain and imaged in 700 nm channel.
- After total protein stain, cut membrane between 50 kDa and 75 kDa bands.
- Stained top half of membrane with vinculin and bottom half with GAPDH primary antibodies and then incubated both membranes with IR Dye 800 secondary antibody.
- Images blots in the 800 channel
- Ladder used is from Bio-Rad (Cat #1610375)
